# Supplementary material
Source: Research Square preprint supplement (doi:10.21203/rs.3.rs-8222236/v1)
Supplement: Supplementary file 1 [file 7bb597fad5d1a9fef240e02e.docx]

**Table 1: Summary statistics of Nearest Neighbor Distance**

| Min | 1st Qu. | Median | Mean | 3rd Qu. | Max |
| --- | --- | --- | --- | --- | --- |
| 0 | 4129 | 5606 | 7597 | 8675 | 45723 |

*Source: GRID3*
